# Supplementary material for: Higher body condition with infection by Haemoproteus parasites in Bananaquits ( Coereba flaveola )
Source: PeerJ journal article supplement (doi:10.7717/peerj.16361), 2024-03-29
Supplement: Sequences.zip [file Sequences.zip]

## Sheet: Sample info
Original ID	Template Name	Template type	Template conc.	Template total vol.	Primer Name	Primer conc.	Primer vol.	Size range (bp)
22	JR-1	PCR	398.2	21 µl	MalUnivF	10µM	200µl	25 bp per primer
24	JR-2	PCR	281	21 µl	MalUnivR	10µM	200µl
34	JR-3	PCR	235.4	21 µl
38	JR-4	PCR	432.1	21 µl
44	JR-5	PCR	285.4	21 µl
45	JR-6	PCR	284.1	21 µl
48	JR-7	PCR	132.5	21 µl
52	JR-8	PCR	265.5	21 µl
58	JR-9	PCR	588.4	21 µl
59	JR-10	PCR	317.6	21 µl
62	JR-11	PCR	288	21 µl
73	JR-12	PCR	255.3	21 µl
75	JR-13	PCR	254	21 µl
78	JR-14	PCR	288	21 µl
82	JR-15	PCR	245.4	21 µl
83	JR-16	PCR	350.9	21 µl
95	JR-17	PCR	135.6	21 µl
121	JR-18	PCR	285.1	21 µl
126	JR-19	PCR	224.6	21 µl
127	JR-20	PCR	228	21 µl
131	JR-21	PCR	292	21 µl
132	JR-22	PCR	294.2	21 µl
133	JR-23	PCR	255.4	21 µl
136	JR-24	PCR	253.2	21 µl
148	JR-25	PCR	308.6	21 µl
153	JR-26	PCR	251.5	21 µl
155	JR-27	PCR	256.9	21 µl
162	JR-28	PCR	252.3	21 µl
169	JR-29	PCR	247.2	21 µl
174	JR-30	PCR	237.8	21 µl
180	JR-31	PCR	233.2	21 µl
183	JR-32	PCR	257.6	21 µl
197	JR-33	PCR	339.3	21 µl
198	JR-34	PCR	292.7	21 µl

## Sheet: Plate strips order
Strip 1	1		2		3		4		5		6		7		8
	Sample	ng/µL	Sample	ng/µL	Sample	ng/µL	Sample	ng/µL	Sample	ng/µL	Sample	ng/µL	Sample	ng/µL	Sample	ng/µL
	JR-1	398.2	JR-2	281	JR-3	235.4	JR-4	432.1	JR-5	285.4	JR-6	284.1	JR-7	132.5	JR-8	265.5
Strip 2	1		2		3		4		5		6		7		8
	Sample	ng/µL	Sample	ng/µL	Sample	ng/µL	Sample	ng/µL	Sample	ng/µL	Sample	ng/µL	Sample	ng/µL	Sample	ng/µL
	JR-9	588.4	JR-10	317.6	JR-11	288	JR-12	255.3	JR-13	254	JR-14	288	JR-15	245.4	JR-16	350.9
Strip 3	1		2		3		4		5		6		7		8
	Sample	ng/µL	Sample	ng/µL	Sample	ng/µL	Sample	ng/µL	Sample	ng/µL	Sample	ng/µL	Sample	ng/µL	Sample	ng/µL
	JR-17	135.6	JR-18	285.1	JR-19	224.6	JR-20	228	JR-21	292	JR-22	294.2	JR-23	255.4	JR-24	253.2
Strip 4	1		2		3		4		5		6		7		8
	Sample	ng/µL	Sample	ng/µL	Sample	ng/µL	Sample	ng/µL	Sample	ng/µL	Sample	ng/µL	Sample	ng/µL	Sample	ng/µL
	JR-25	308.6	JR-26	251.5	JR-27	256.9	JR-28	252.3	JR-29	247.2	JR-30	237.8	JR-31	233.2	JR-32	257.6
Strip 5	1		2		3		4		5		6		7		8
	Sample	ng/µL	Sample	ng/µL	Sample	ng/µL	Sample	ng/µL	Sample	ng/µL	Sample	ng/µL	Sample	ng/µL	Sample	ng/µL
	JR-33	339.3	JR-34	292.7	Control		EMPTY		EMPTY		EMPTY		EMPTY		EMPTY
